# Supplementary material
Source: publisher figshare collection journal article supplement (https://plos.figshare.com/articles/dataset/_/3836784)
Supplement: Supplementary file 1 [file 1]

Archive with 9 entries (9 files):
- S1 Fig.TIF
- S2 Fig.TIF
- S1 Table.PDF
- S2 Table.PDF
- S3 Table.PDF
- S4 Table.PDF
- S5 Table.PDF
- S1 File.PDF
- S2 File.PDF
