# Supplementary material
Source: publisher figshare collection journal article supplement (https://plos.figshare.com/articles/dataset/_/3836784)
Supplement: Supplementary file 1 [file 1 › S1 Table.PDF]

**S1 Table:** Details of the Geographic Information Systems manipulations required to convert the collected data into risk factor layers in raster format

| Collected data associated to RVF suitability                                           | GIS manipulation                                                                                                                                                                                                                                                 | Risk factor raster                  |                         |
|----------------------------------------------------------------------------------------|------------------------------------------------------------------------------------------------------------------------------------------------------------------------------------------------------------------------------------------------------------------|-------------------------------------|-------------------------|
| Districts (polygons)<br>Table with number of sheep per district                        | Join geographic layer and table.<br>Calculate animal densities (nb animal/km <sup>2</sup> ).                                                                                                                                                                     | Sheep density                       |                         |
| Districts (polygons)<br>Table with number of goats per district                        |                                                                                                                                                                                                                                                                  | Goat density                        |                         |
| Districts (polygons)<br>Table with number of cattle per district                       |                                                                                                                                                                                                                                                                  | Cattle density                      |                         |
| Small ruminants' markets of Uganda, Ethiopia, and Kenya (points)                       | Calculate and map distance (km) to markets                                                                                                                                                                                                                       | Distance to markets                 |                         |
| Population map<br>(resolution 0.000833333° ~ 900 m at the latitude of the study area ) | Calculate and map distance (km) to areas with population densities > 1000 inhab./km <sup>2</sup> , with elevation map as cost map                                                                                                                                |                                     |                         |
| Roads (polylines)                                                                      | Calculate and map density of roads per 100 square kilometres                                                                                                                                                                                                     | Density of roads                    |                         |
| Railways (polylines)                                                                   | Calculate and map density of railways per 100 square kilometres                                                                                                                                                                                                  | Density of railways                 |                         |
| Wildlife national parks (polygons)                                                     | Calculate and map distance (km) to: Conservation Area, Controlled Hunting Area, Game Controlled Area, Game Reserve, Game sanctuary, Hunting reserve, National Park, National Reserve, Nature Reserve, Sanctuary, Wildlife Reserve. Use elevation map as cost map | Distance to wildlife national parks |                         |
| Rivers and wetlands (polylines and polygons)                                           | Calculate and map distance (km) to rivers and wetlands, with elevation map as cost map                                                                                                                                                                           | Distance to rivers and wetlands     |                         |
| Elevation map<br>(resolution 90 m x 90 m)                                              | Apply a scaling function (negative linear relationship)                                                                                                                                                                                                          | Elevation index                     | Vector index<br>(Eq. 2) |
|                                                                                        | Calculate slope and extract plain areas                                                                                                                                                                                                                          | Plain index                         |                         |
| Land cover map<br>(resolution 300 m x 300 m)                                           | Extract bushy areas and reclassify (1: bush; 0: other land cover types)                                                                                                                                                                                          | Bush index                          |                         |
| Global soil map (polygons)                                                             | Extract water retaining soils (1: water retaining soils; 0: other soil types)                                                                                                                                                                                    | Soil index                          |                         |
