# Supplementary material
Source: publisher figshare collection journal article supplement (https://plos.figshare.com/articles/dataset/_/3836784)
Supplement: Supplementary file 1 [file 1 › S2 File.PDF]

## S2 File. Sensitivity analysis

A sensitivity analysis was conducted to assess the sensitivity of the method to the expert choices. To determine the effect of a change in the weights applied to each risk factor, the range of weight values to explore was defined by adding and subtracting 25% from the original weights. Ten weight values ( $w_m$ ) within this range were tested (+/-5%, +/- 10%, +/- 15%, +/-20% and +/-25%). Each of the newly calculated weight was incorporated into the modelling process, while other factor weights were proportionally decreased or increased such that the sum of the weights equals 1:

$$w_i = (1 - w_m) * \frac{w_{i0}}{1 - w_{m0}}, \quad 1 \leq i \leq n, i \neq m \quad (1)$$

where  $w_{m0}$  and  $w_{i0}$  are the weights in the base model of the main changing risk factor and of the  $i$ -th risk factor, respectively.

For each combination of weights obtained, a map of suitability index for RVF amplification, spread and occurrence was computed. A total of 169 suitability maps for RVF occurrence were thus generated.

Based on these different realizations, the contributions of the variation weights to the suitability index variability, averaged at country-level were evaluated using a linear regression [1]. For each aggregated output, a linear regression model was fitted with all the principal effects of the risk factors. The contribution of factor  $i$  to the variation in output was the ratio of the sum of squares related to  $i$  on the total sum of squares of the model.

## References.

1. Saltelli, A., K. Chan, and E.M. Scott, *Sensitivity Analysis*. 2000, New York, NY, USA: John Wiley and Sons.
