# Supplementary material
Source: publisher figshare collection journal article supplement (https://plos.figshare.com/articles/dataset/_/3836784)
Supplement: Supplementary file 1 [file 1 › S2 Table.PDF]

**S2 Table: Scaling functions applied to Rift Valley fever risk factor layers**

| <b>Risk factor map</b>               | <b>Scaling function</b>                                                                                                 |
|--------------------------------------|-------------------------------------------------------------------------------------------------------------------------|
| Sheep density                        | Positive linear relationship                                                                                            |
| Goat density                         | Positive linear relationship                                                                                            |
| Cattle density                       | Positive linear relationship                                                                                            |
| Proximity to markets                 | Sigmoidal, monotonically decreasing relationship between 0 and 50 km, with negligible risk after 50 km <sup>1</sup> .   |
| Density of roads                     | Positive linear relationship                                                                                            |
| Density of railways                  | Positive linear relationship                                                                                            |
| Proximity to wildlife national parks | Sigmoidal, monotonically decreasing relationship between 0 and 100 km, with negligible risk after 100 km <sup>1</sup> . |
| Proximity to rivers and wetlands     | Sigmoidal, monotonically decreasing relationship between 0 and 50 km, with negligible risk after 50 km <sup>1</sup> .   |
| Vector index map                     | No manipulation required                                                                                                |

---

<sup>1</sup> From expert knowledge on domestic and wild ruminants mobilities
