# Supplementary material
Source: publisher figshare collection journal article supplement (https://plos.figshare.com/articles/dataset/_/3836784)
Supplement: Supplementary file 1 [file 1 › S3 Table.PDF]

**S3 Table. Correlation matrix for risk factors associated with Rift Valley fever amplification and spread.**

| <b>Risk factor*</b> | Sheep | Goat        | Cattle      | Markets | Roads | Rails | Water | Parks | Vector |
|---------------------|-------|-------------|-------------|---------|-------|-------|-------|-------|--------|
| Sheep               | 1.00  | <b>0.61</b> | <b>0.71</b> | 0.30    | 0.15  | 0.06  | 0.08  | 0.03  | 0.18   |
| Goat                | 0.61  | 1.00        | <b>0.53</b> | 0.21    | 0.07  | 0.02  | 0.07  | 0.08  | 0.02   |
| Cattle              | 0.71  | 0.53        | 1.00        | 0.28    | 0.27  | 0.01  | 0.13  | 0.01  | 0.21   |
| Markets             | 0.30  | 0.21        | 0.28        | 1.00    | 0.39  | 0.19  | 0.11  | 0.08  | 0.13   |
| Roads               | 0.15  | 0.07        | 0.27        | 0.39    | 1.00  | 0.24  | 0.02  | 0.08  | 0.20   |
| Rails               | 0.06  | 0.02        | 0.01        | 0.19    | 0.24  | 1.00  | 0.15  | 0.09  | 0.00   |
| Water               | 0.08  | 0.07        | 0.13        | 0.11    | 0.02  | 0.15  | 1.00  | 0.19  | 0.02   |
| Parks               | 0.03  | 0.08        | 0.01        | 0.08    | 0.08  | 0.09  | 0.19  | 1.00  | 0.07   |
| Vector              | 0.18  | 0.02        | 0.21        | 0.13    | 0.20  | 0.00  | 0.02  | 0.07  | 1.00   |

\* Sheep: sheep density; Goat: goat density; Cattle: cattle density; Markets: proximity to ruminant's markets; Roads: density of roads; Rivers: proximity to rivers; Railways: density of railways; Parks: proximity to wildlife national parks; Vector: vector index.
