# Supplementary material
Source: publisher figshare collection journal article supplement (https://plos.figshare.com/articles/dataset/_/3836784)
Supplement: Supplementary file 1 [file 1 › S4 Table.PDF]

**S4 Table. Pair-wise comparison matrixes of the Analytical Hierarchy Process (AHP) for risk factors associated with Rift Valley fever amplification.**

| <b>Risk factor*</b> | Sheep | Goat | Cattle | Markets | Roads | Rivers | Railways | Parks | <b>Weight</b> |
|---------------------|-------|------|--------|---------|-------|--------|----------|-------|---------------|
| Sheep               | 1     | 1    | 3      | 5       | 7     | 7      | 7        | 7     | <b>0.288</b>  |
| Goat                |       | 1    | 3      | 5       | 7     | 7      | 7        | 7     | <b>0.288</b>  |
| Cattle              |       |      | 1      | 5       | 7     | 7      | 7        | 7     | <b>0.203</b>  |
| Markets             |       |      |        | 1       | 3     | 3      | 3        | 3     | <b>0.080</b>  |
| Roads               |       |      |        |         | 1     | 1      | 1        | 3     | <b>0.042</b>  |
| Rivers              |       |      |        |         |       | 1      | 1        | 1     | <b>0.034</b>  |
| Railways            |       |      |        |         |       |        | 1        | 1     | <b>0.034</b>  |
| Parks               |       |      |        |         |       |        |          | 1     | <b>0.031</b>  |

\* Sheep: sheep density; Goat: goat density; Cattle: cattle density; Markets: proximity to ruminant's markets; Roads: density of roads; Rivers: proximity to rivers; Railways: density of railways; Parks: proximity to wildlife national parks. Vector index is not included in the pair-wise matrix as its weight is equal to 1 in Equation 2 (S1 File).
