# Supplementary material
Source: publisher figshare collection journal article supplement (https://plos.figshare.com/articles/dataset/_/3836784)
Supplement: Supplementary file 1 [file 1 › S5 Table.PDF]

**S5 Table. Pair-wise comparison matrix of the Analytical Hierarchy Process (AHP) for risk factors associated with Rift Valley fever spread.**

| <b>Risk factor*</b> | Vector | Sheep | Goat | Cattle | Markets | Roads | Rivers | Railways | Parks | <b>Weight</b> |
|---------------------|--------|-------|------|--------|---------|-------|--------|----------|-------|---------------|
| Vector              | 1      | 1/7   | 1/7  | 1/5    | 1/5     | 1/3   | 1/3    | 1/3      | 1/3   | <b>0.025</b>  |
| Sheep               |        | 1     | 1    | 3      | 1       | 3     | 3      | 3        | 3     | <b>0.204</b>  |
| Goat                |        |       | 1    | 3      | 1       | 3     | 3      | 3        | 3     | <b>0.204</b>  |
| Cattle              |        |       |      | 1      | 1       | 3     | 3      | 3        | 3     | <b>0.144</b>  |
| Markets             |        |       |      |        | 1       | 3     | 3      | 3        | 3     | <b>0.175</b>  |
| Roads               |        |       |      |        |         | 1     | 1      | 1        | 1     | <b>0.062</b>  |
| Rivers              |        |       |      |        |         |       | 1      | 1        | 1     | <b>0.062</b>  |
| Railways            |        |       |      |        |         |       |        | 1        | 1     | <b>0.062</b>  |
| Parks               |        |       |      |        |         |       |        |          | 1     | <b>0.062</b>  |

\* Vector: vector index; Sheep: sheep density; Goat: goat density; Cattle: cattle density;

Markets: proximity to ruminant's markets; Roads: density of roads; Rivers: proximity to

rivers; Railways: density of railways; Parks: proximity to wildlife national parks.
